# Supplementary material for: Viral Retinopathy in Experimental Models of Zika Infection
Source: PubMed Central journal article supplement — Invest Ophthalmol Vis Sci. 2017 Aug;58(10):4075–85. doi: 10.1167/iovs.17-22016 (PMC5558627; doi:10.1167/iovs.17-22016), 2017-08
Supplement: IOVS-58-10-14_s01.pdf [file IOVS-58-10-14_s01.pdf]

Figure S1

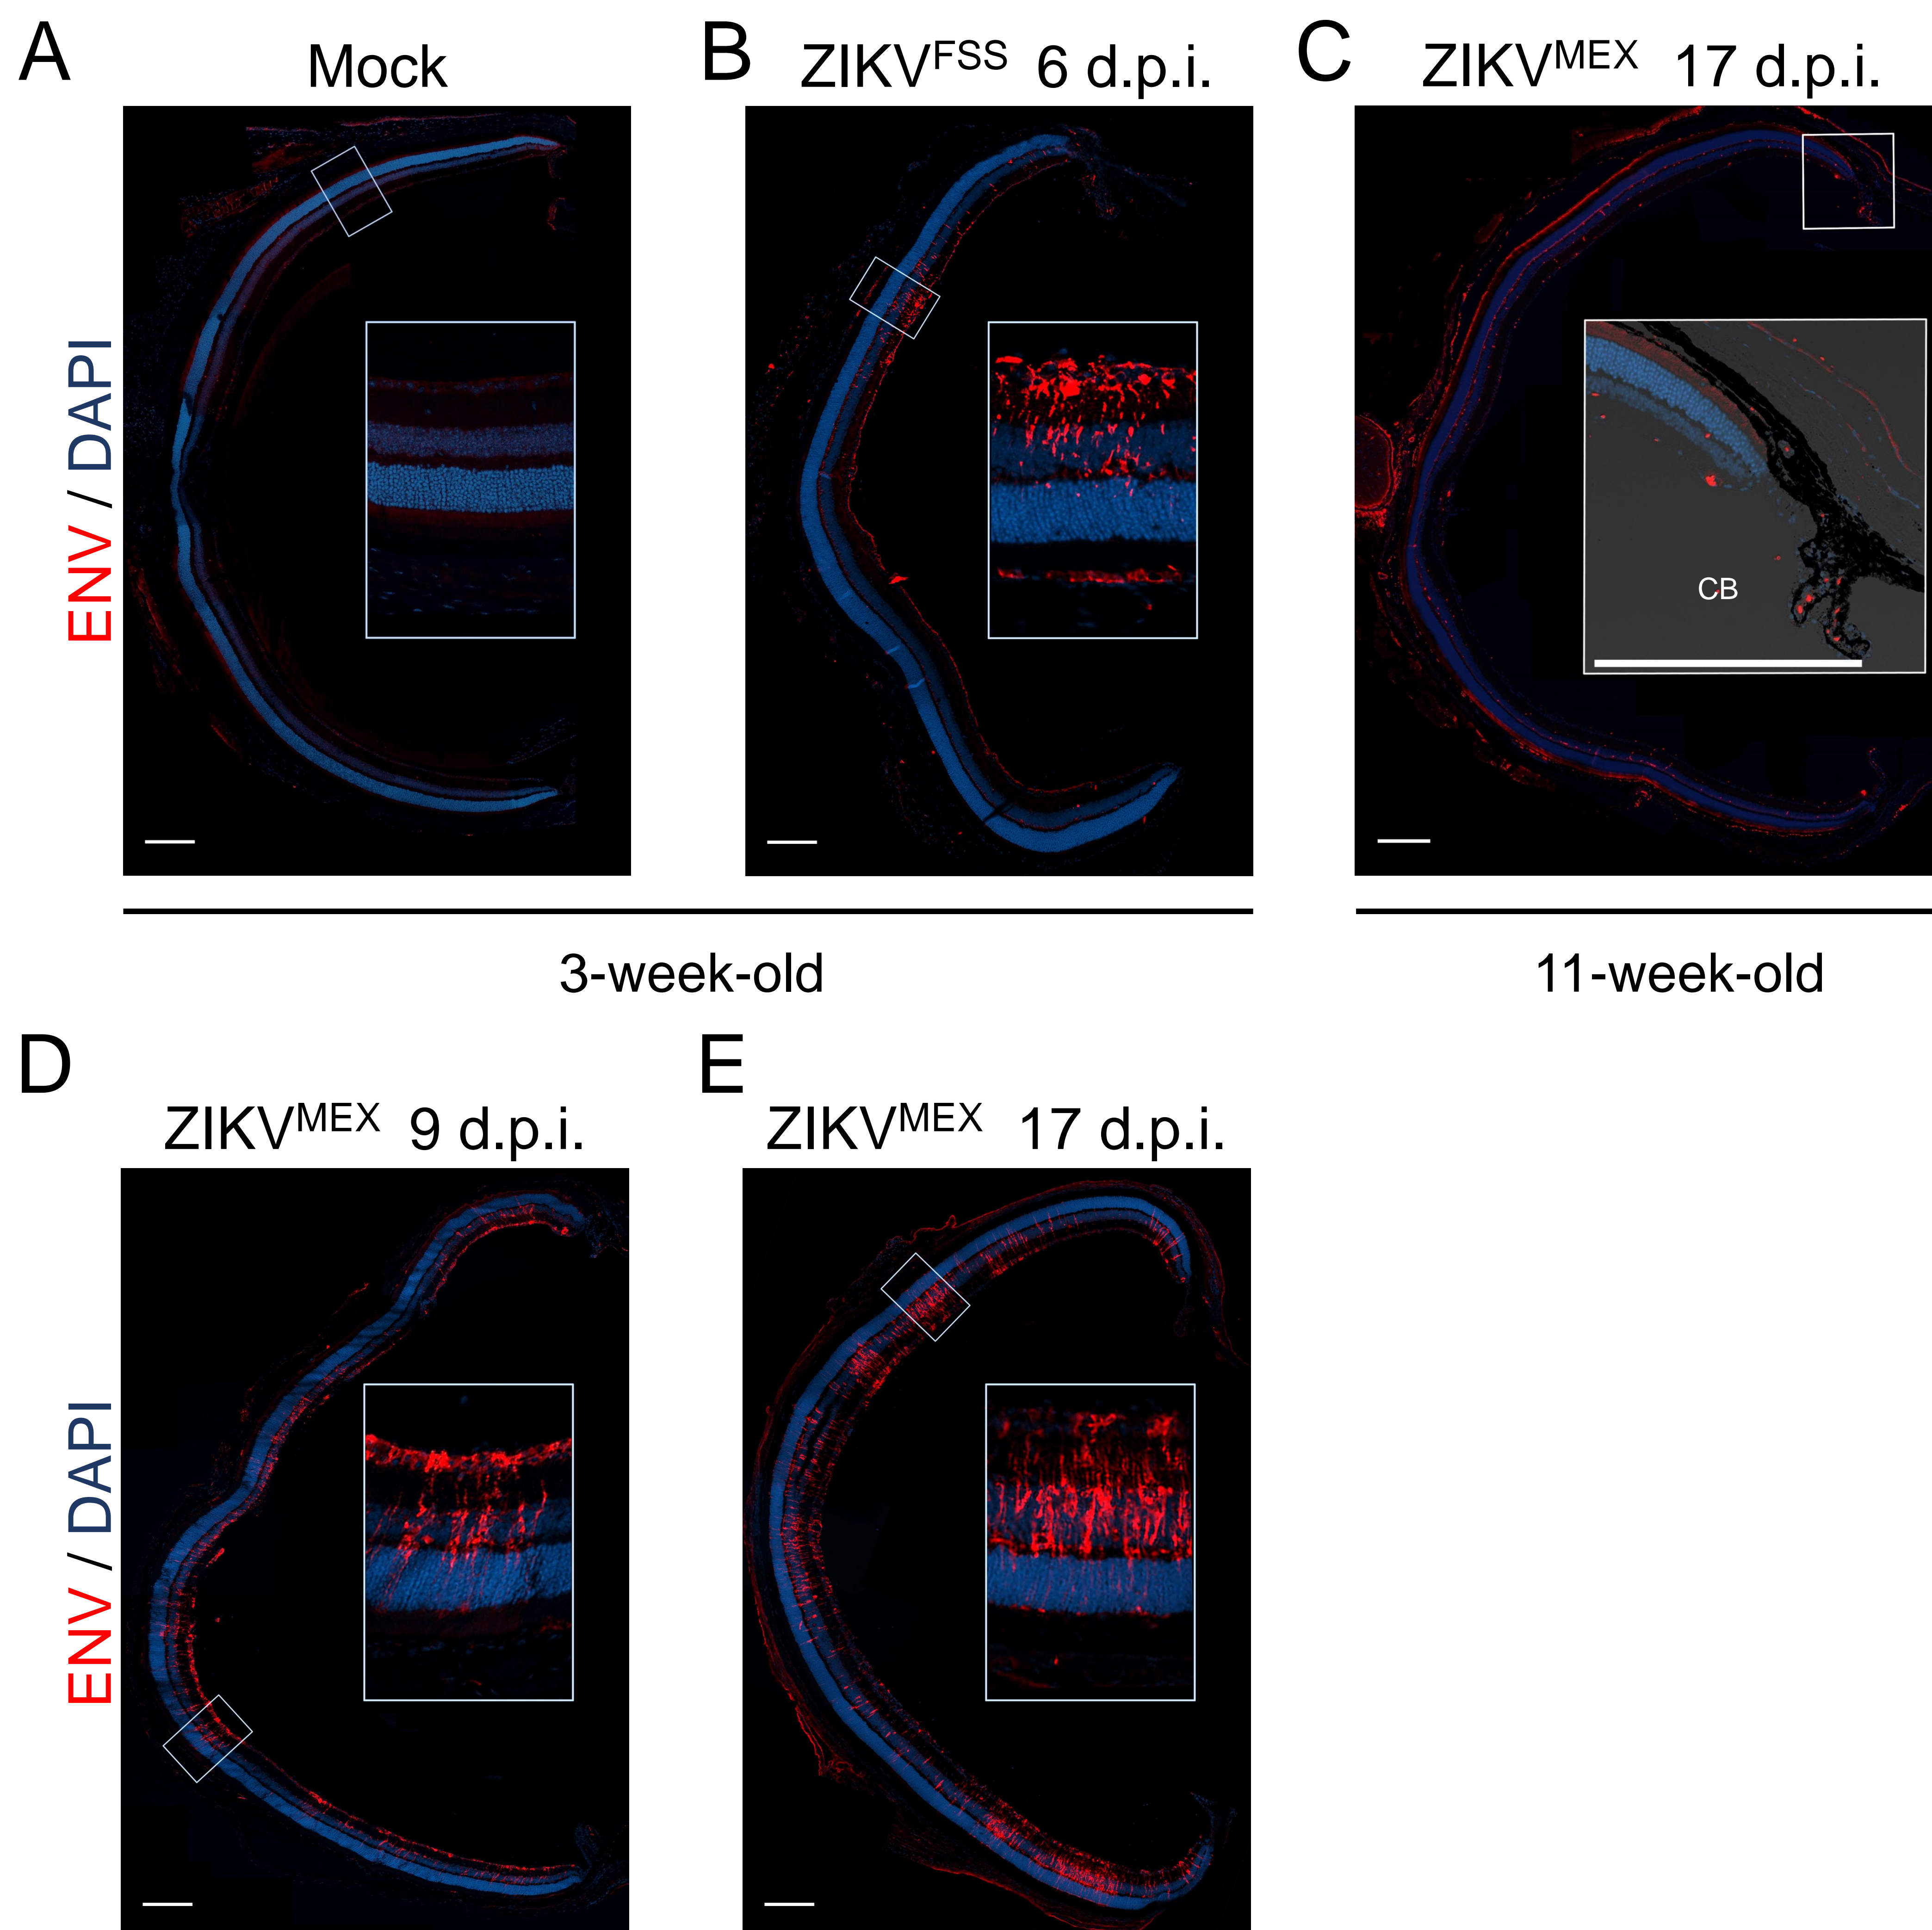

Figure **S1**: **Age- and time-dependent ZIKV infection in the retina.** Panoramic images of whole retinal sagittal sections with ZIKV ENV staining. Samples in **A**, **B**, **D** and **E** were collected from 3-week-old mice inoculated with either ZIKV<sup>FSS</sup> or ZIKV<sup>MEX</sup>. Panel **C** is a representative image from an 11-week-old mice infected with ZIKV<sup>FSS</sup> for 17days. CB, ciliary body. Scale bar = 200 μm.

# Figure S2

## A

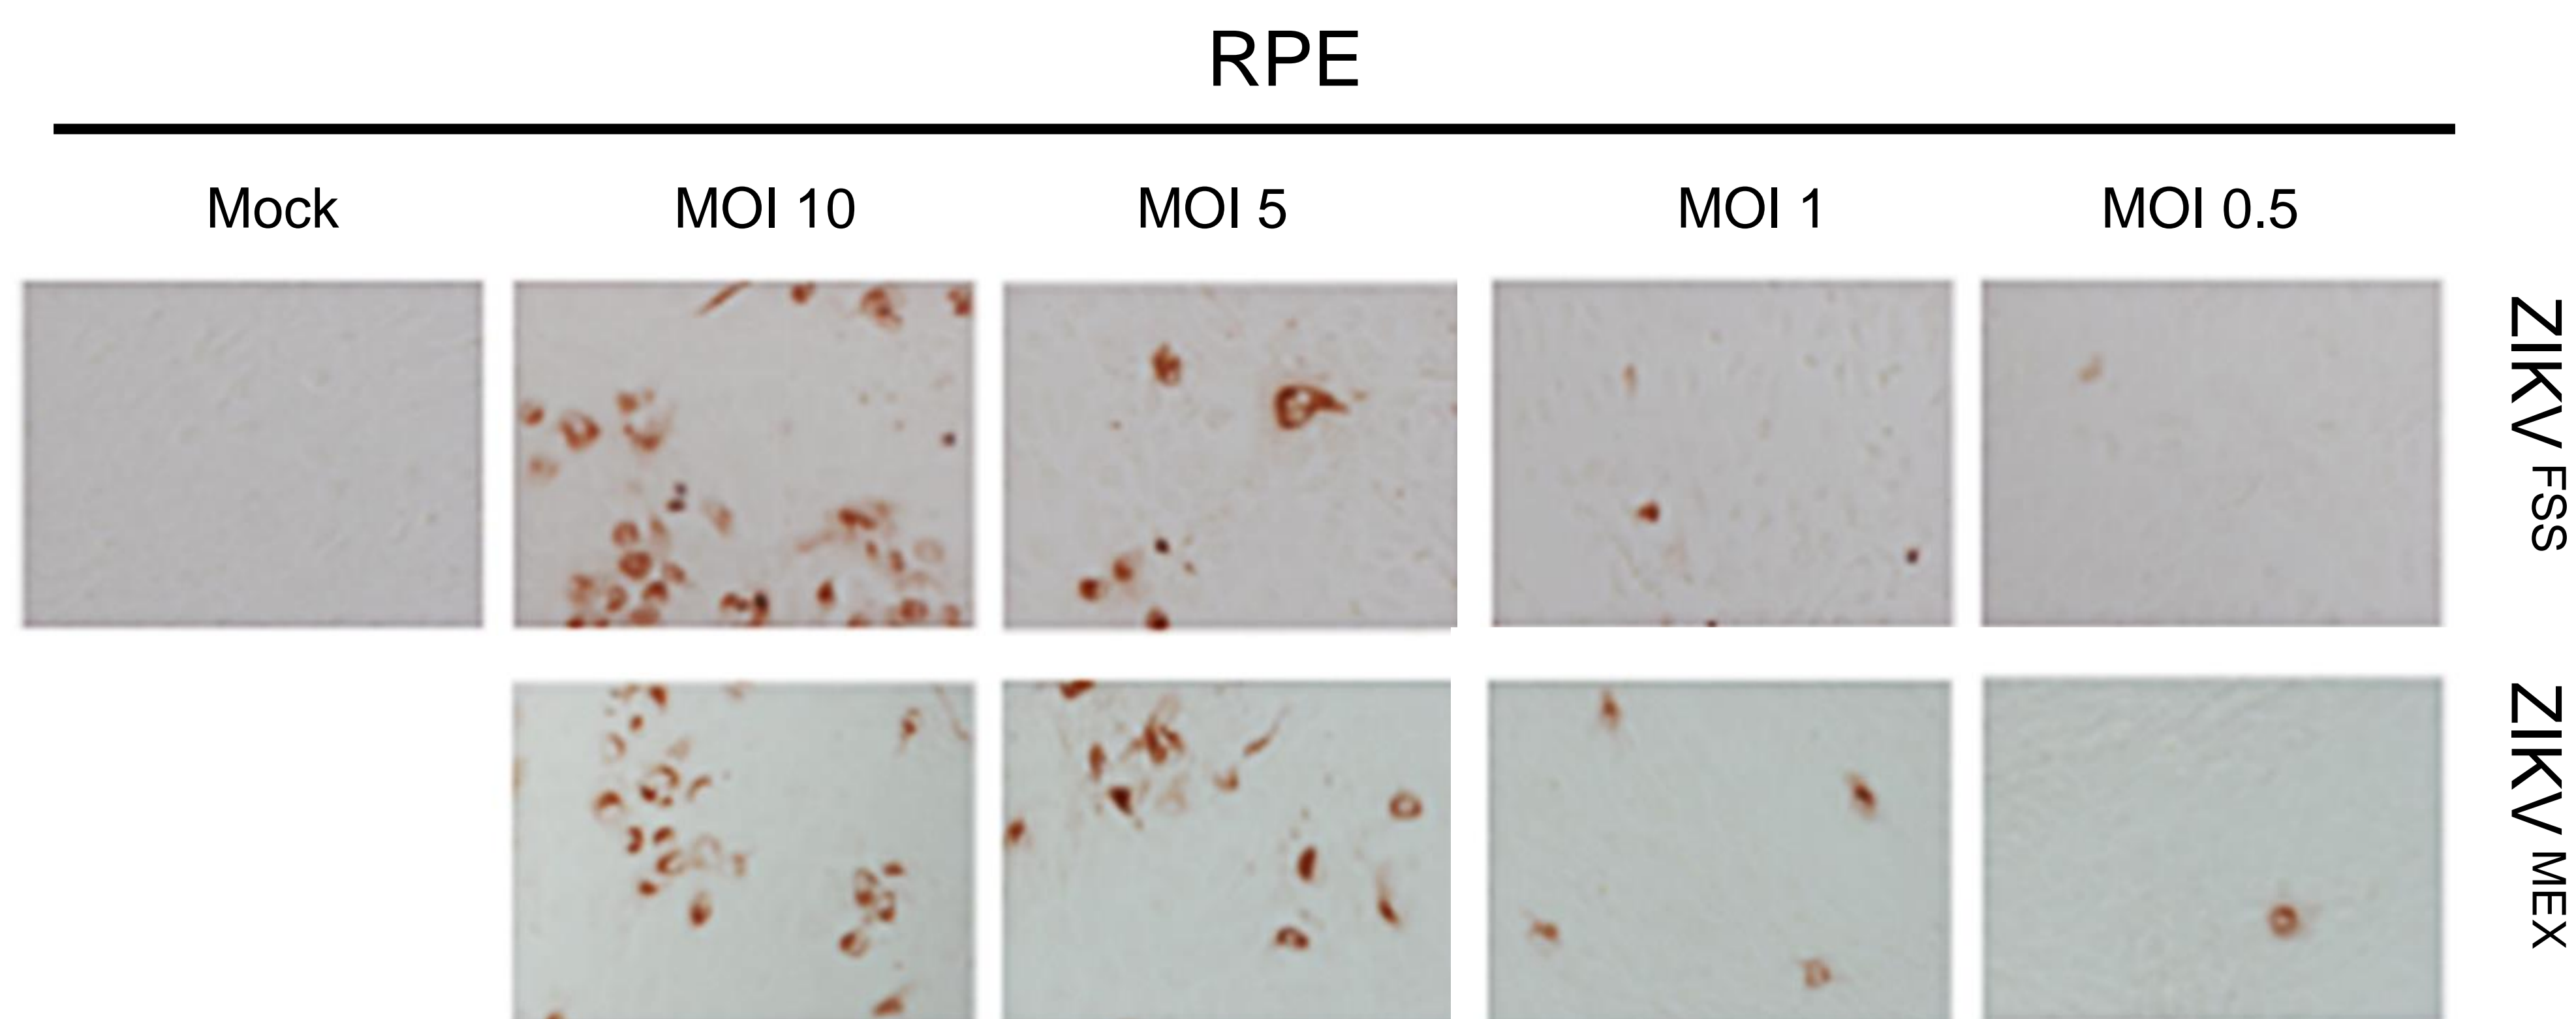

## B

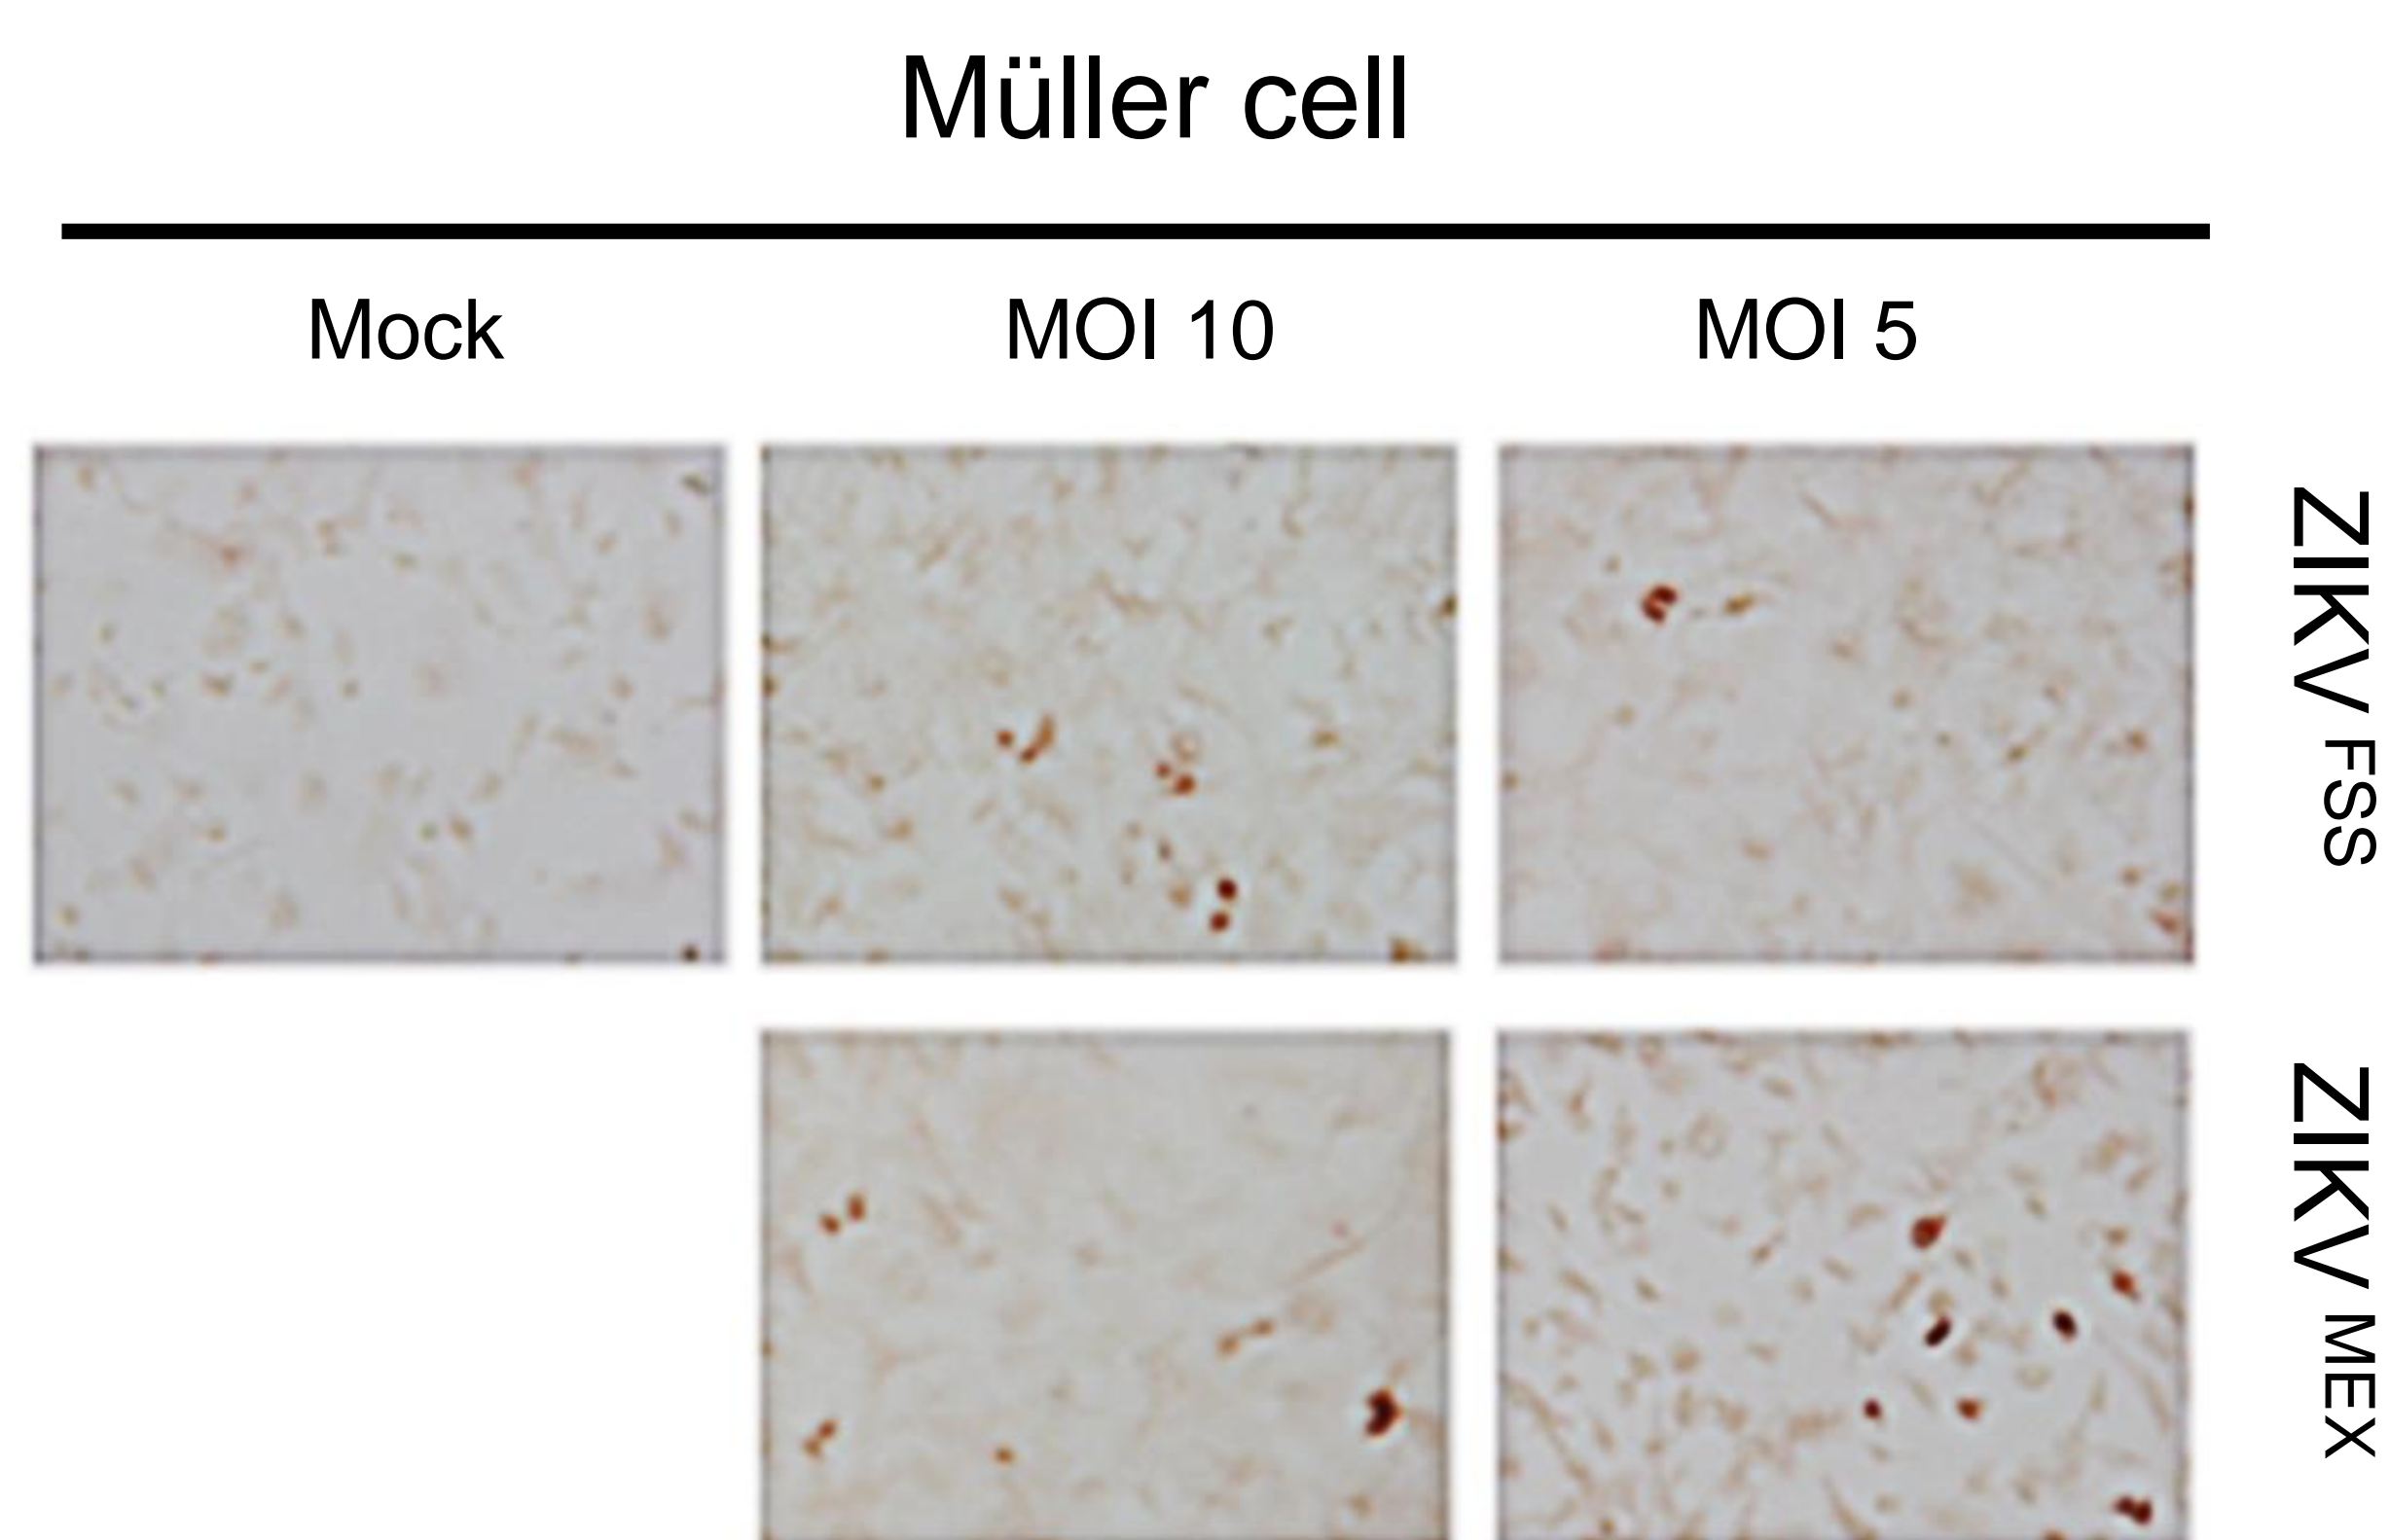

## C

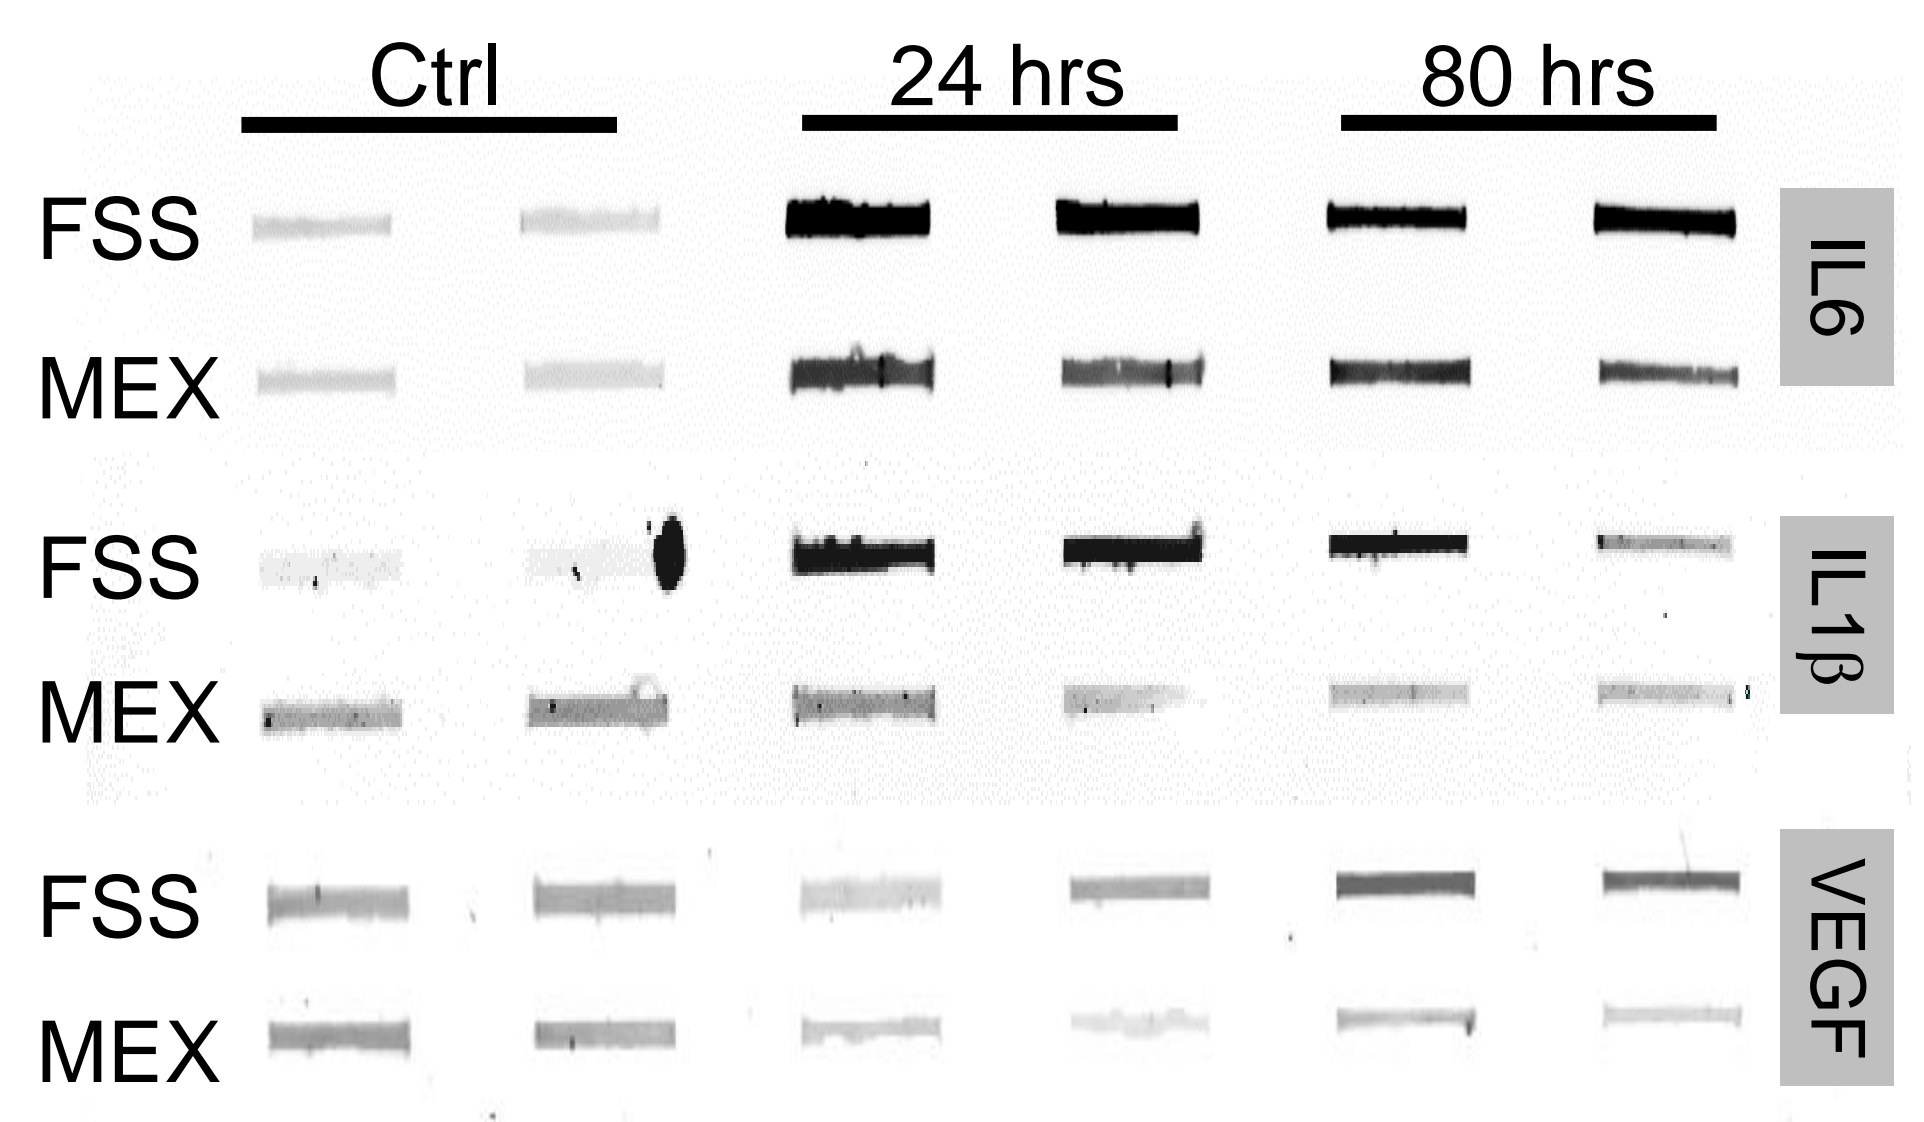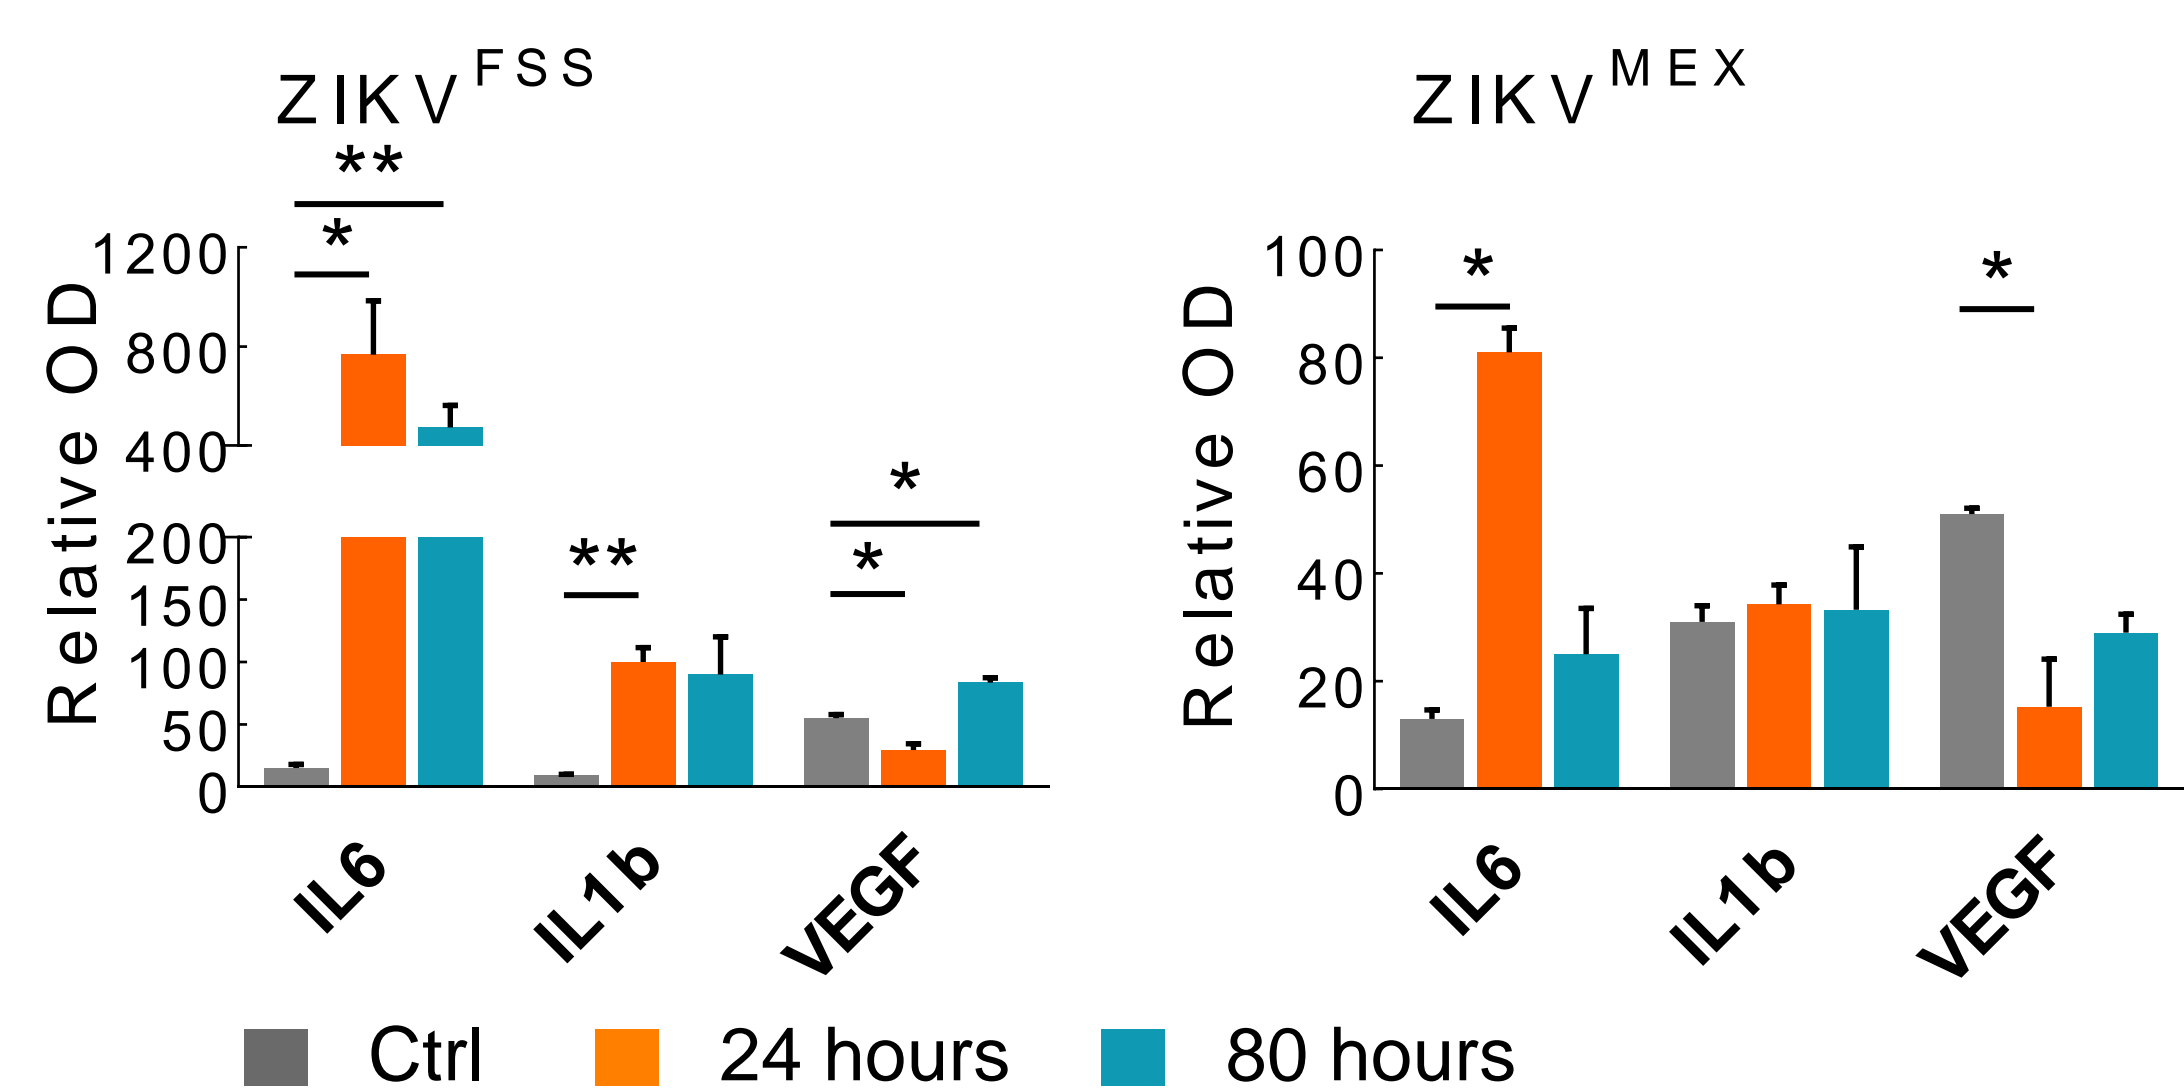

**Figure S2: ZIKV infects primary cultured RPE and Müller cells.** (A and B) Representative images of virus staining in RPE and Müller cells for plaque-forming assay. (C) Cytokine dot-blot of cultured Müller cell supernates collected at 0, 24 and 80 hours after ZIKV infection. Experiments were carried out at MOI=5 and repeated for 3 times. Data were analyzed by One-way ANOVA with *Turkey* test for multiple comparison. \* $p<0.05$ , \*\* $p<0.01$ .

# Figure S3

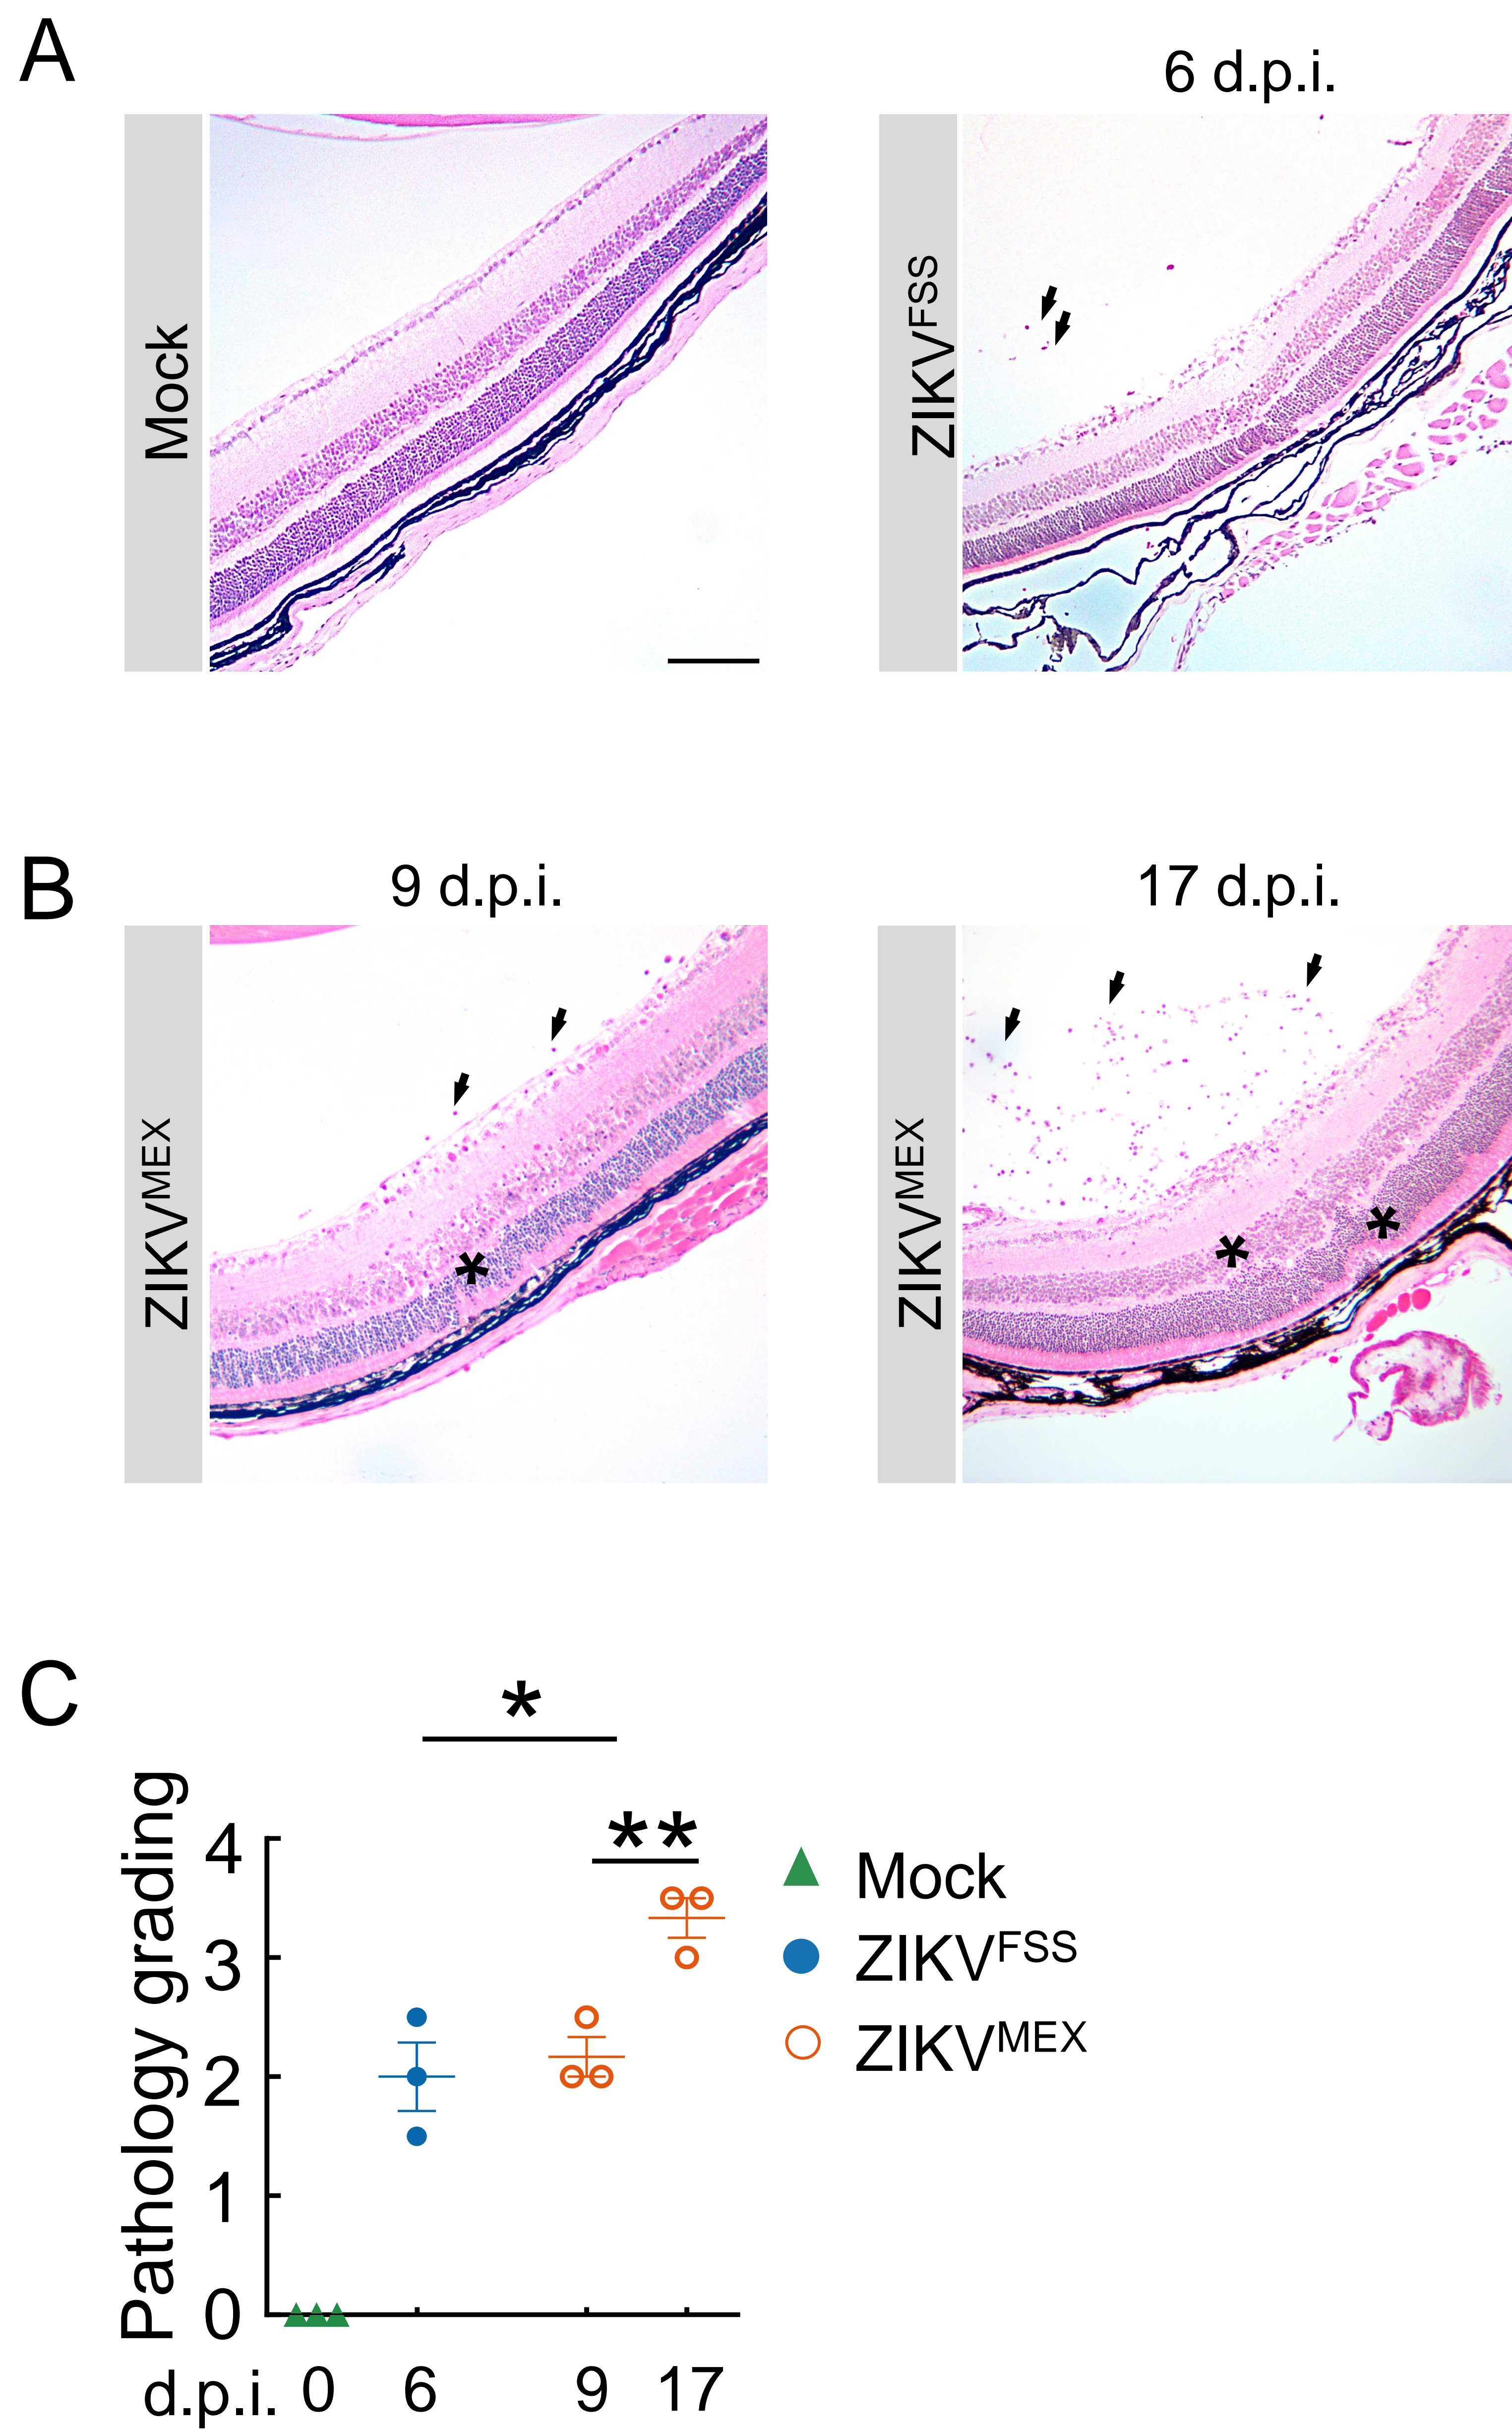

**Figure S3: Retinal inflammation and pathology caused by ZIKV infection. (A and B)** Representative images of H&E stained retinal sections at indicated time points post ZIKV inoculation. Arrows, intravitreal cell infiltration; asterisks, retinal folding with photoreceptor loss. **(C)** Severity of retinal damage was scored as mentioned before. Data were presented as mean  $\pm$  s.e.m. \* $P$ <0.05, \*\* $P$ <0.01. Scale bar = 200  $\mu$ m,

# Figure S4

A

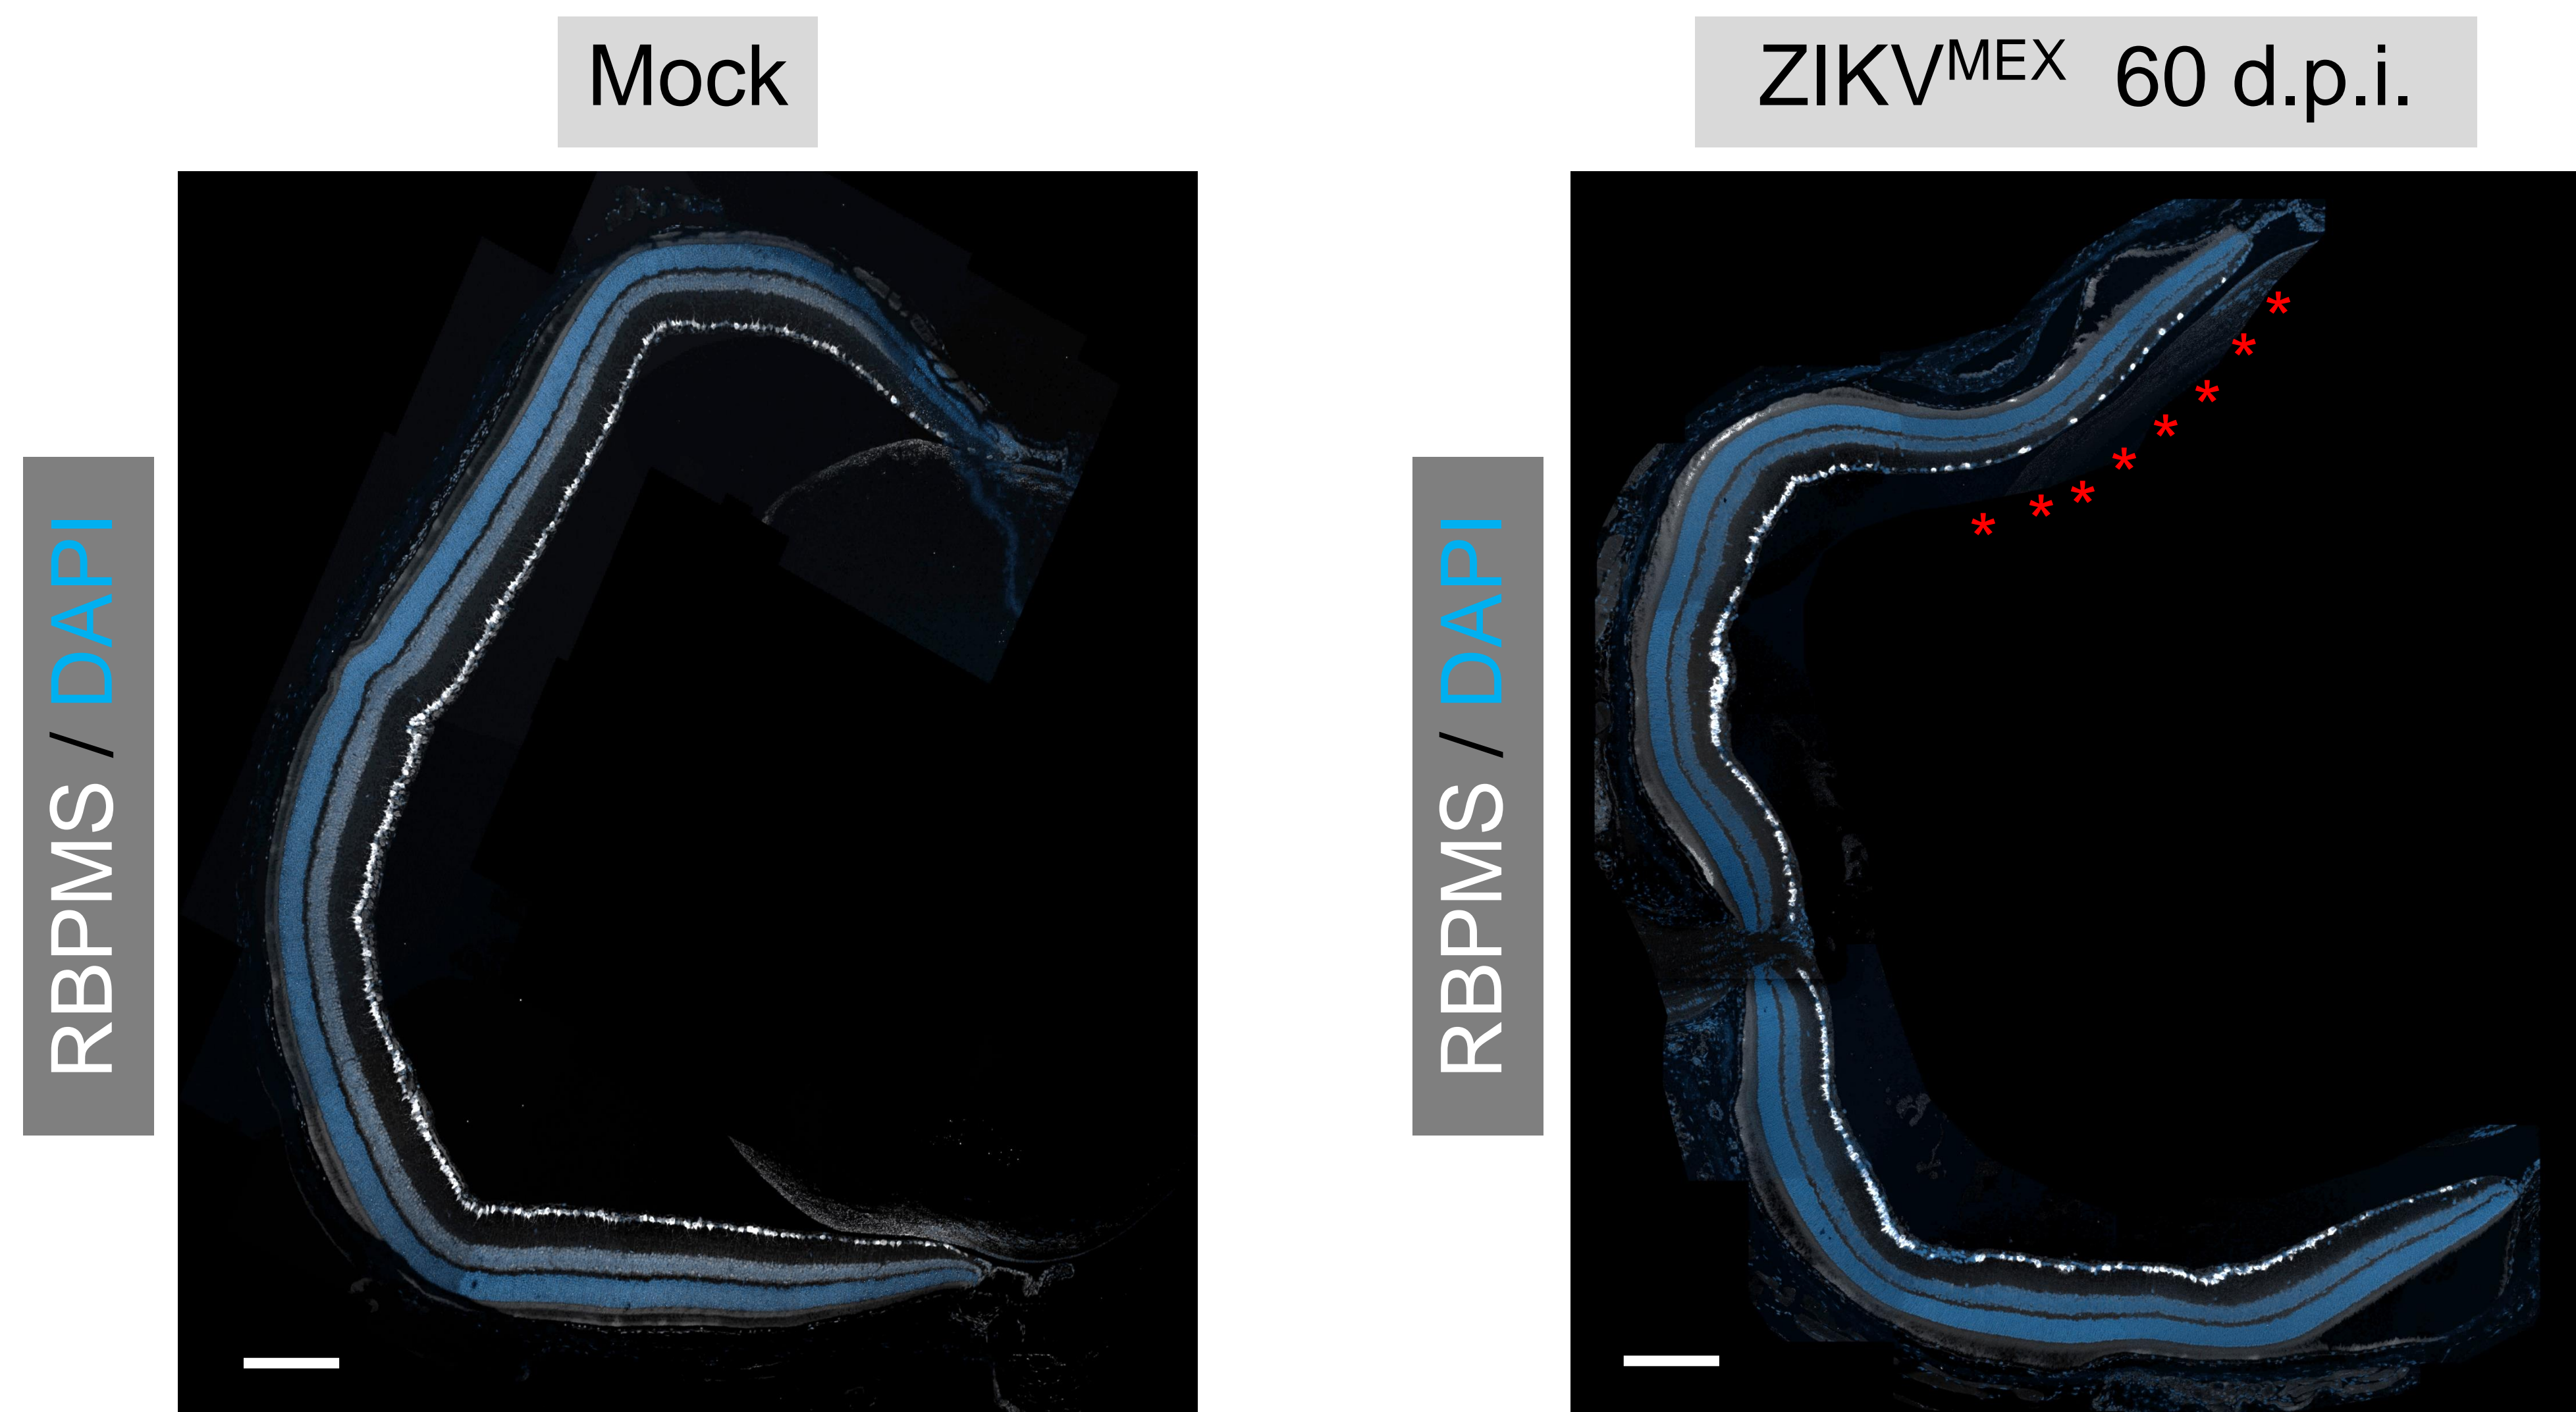

B

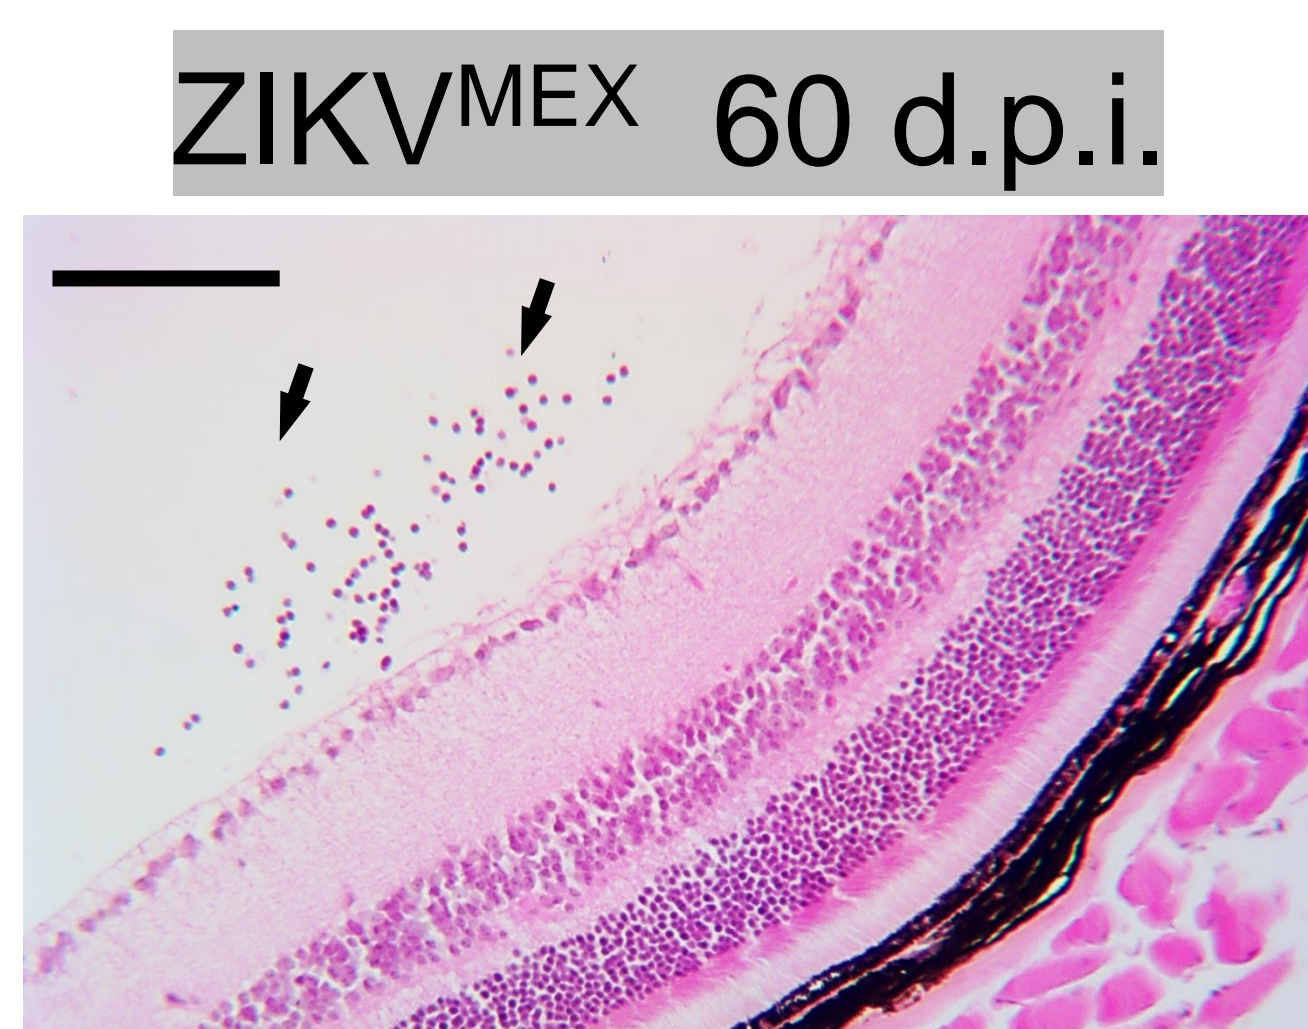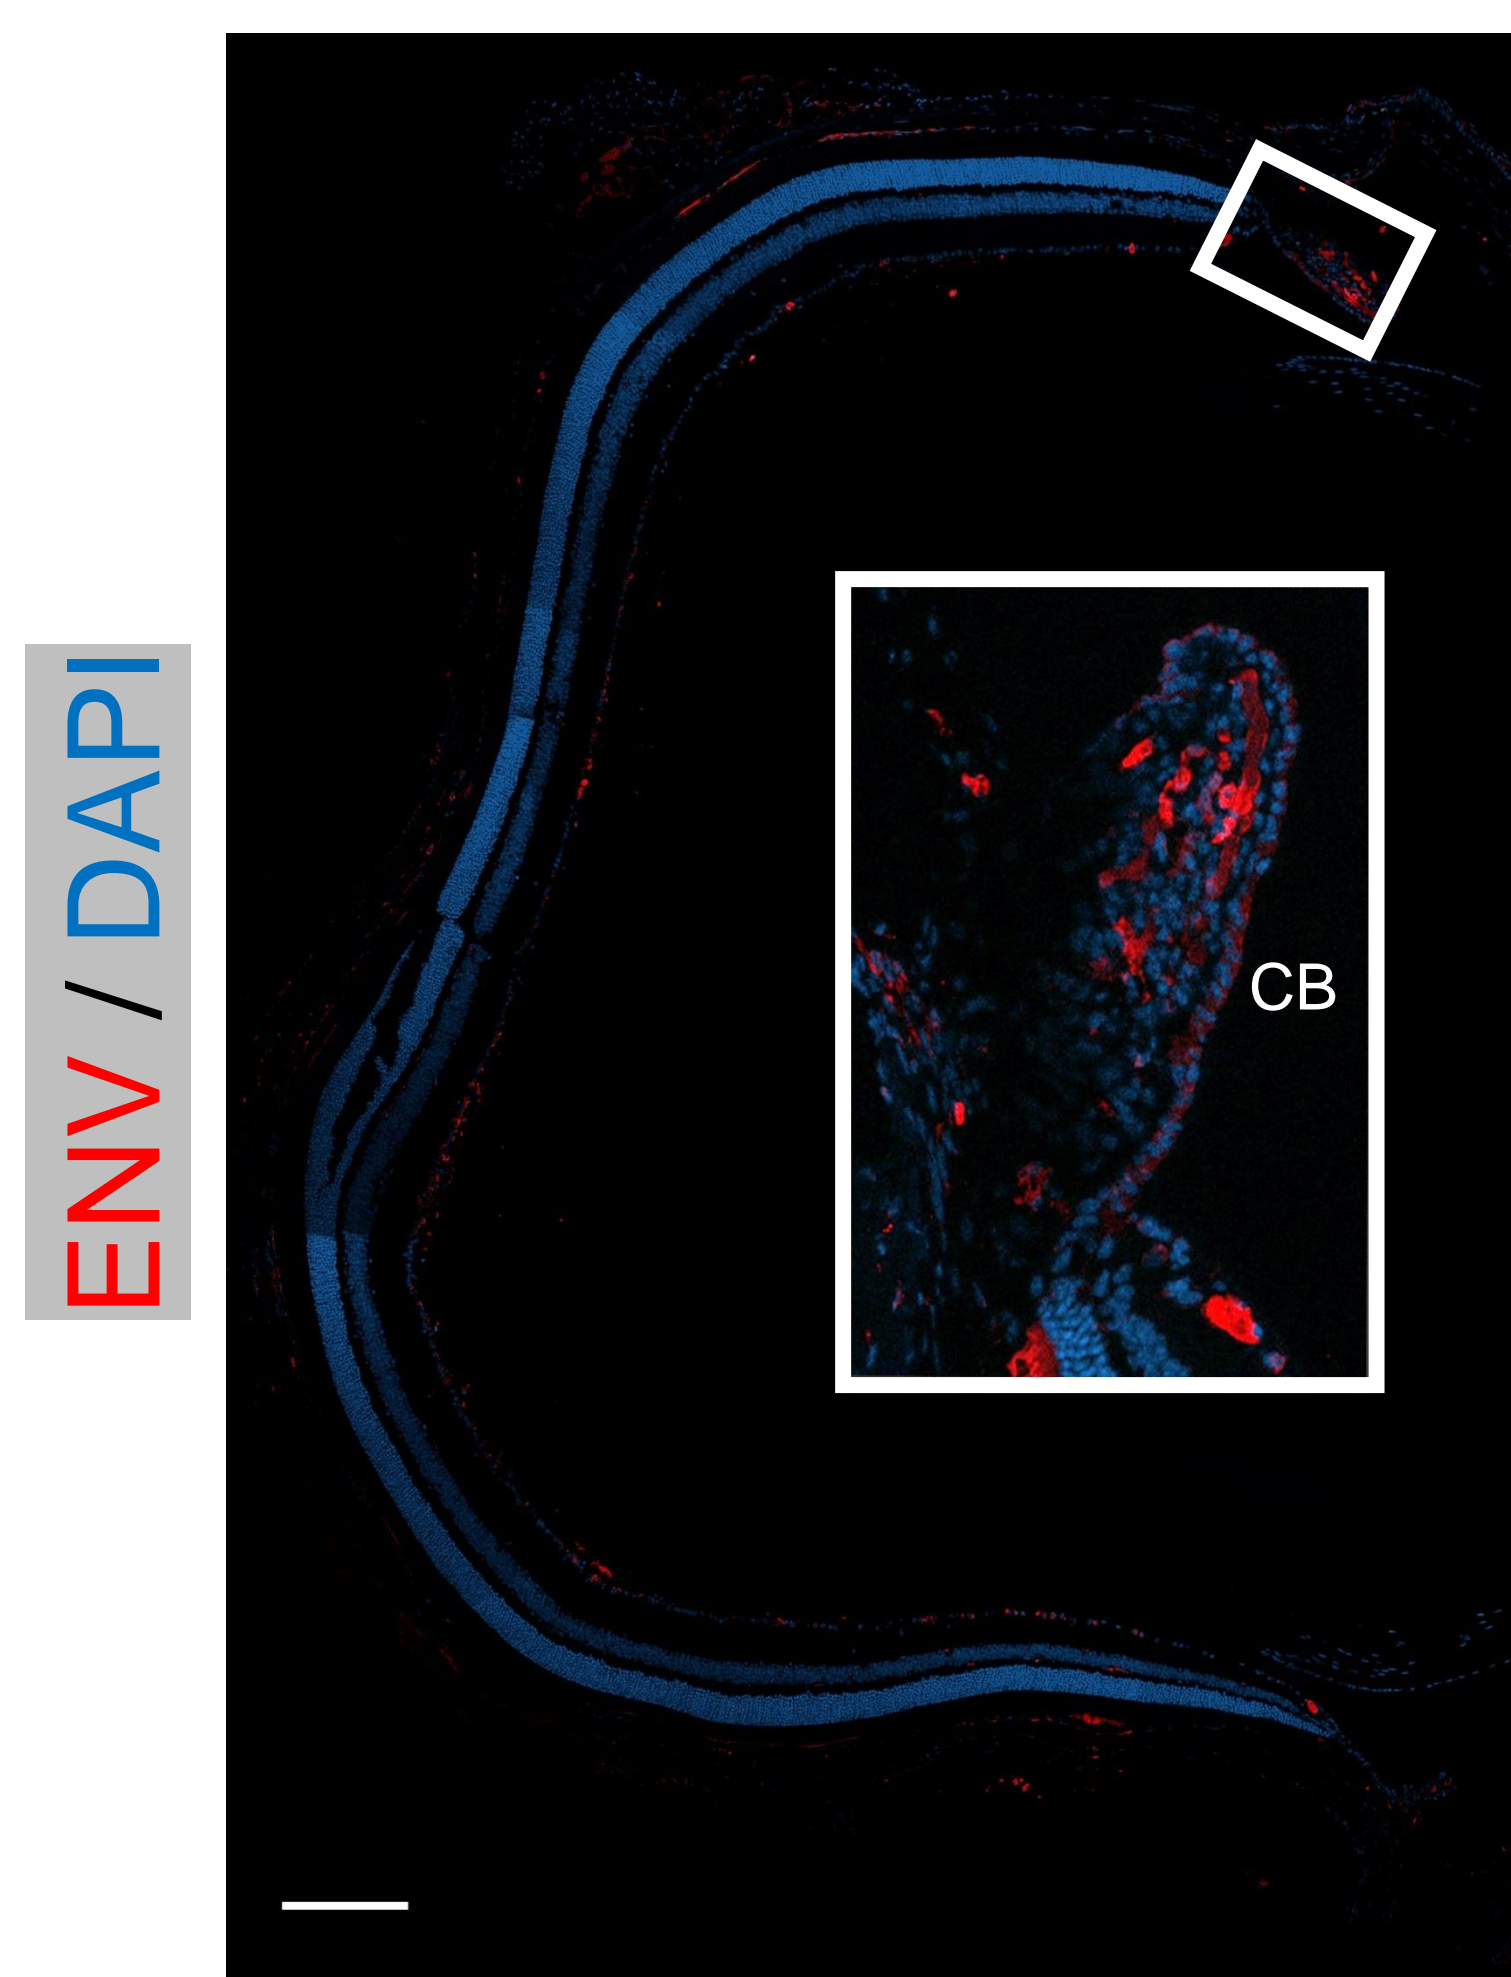

C

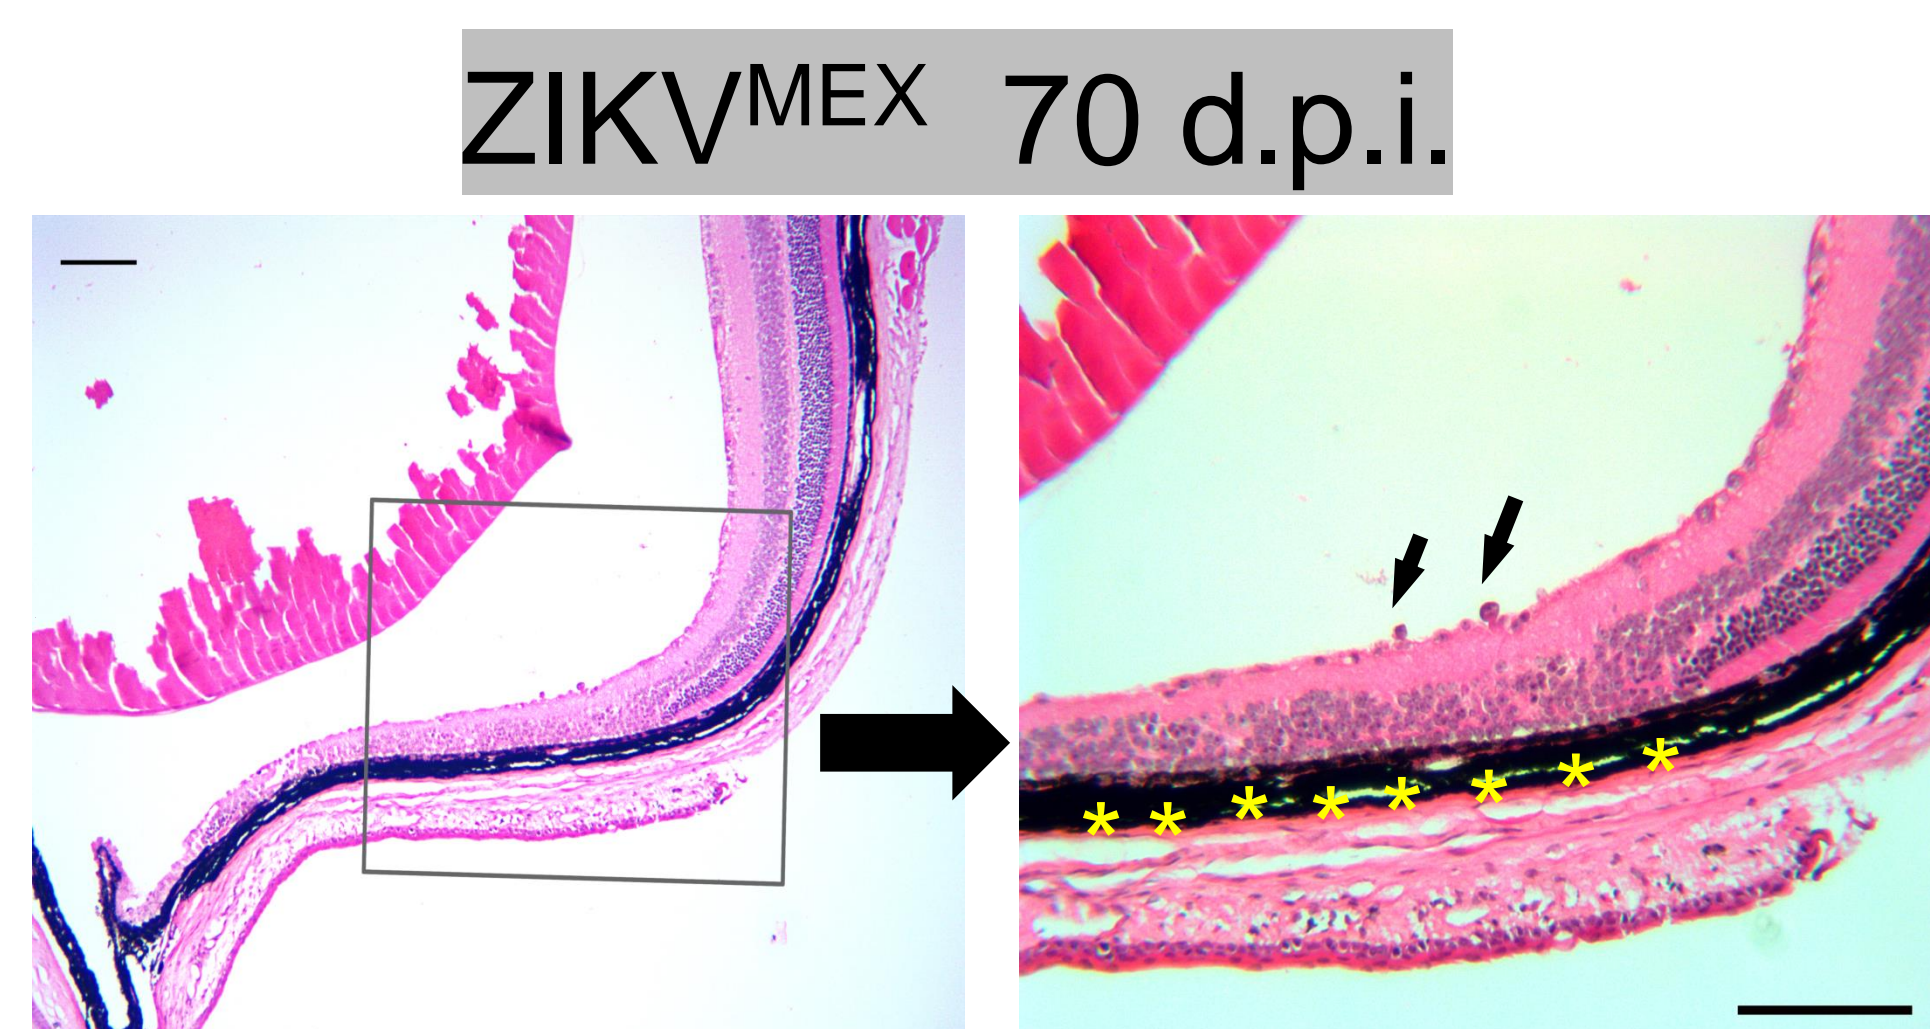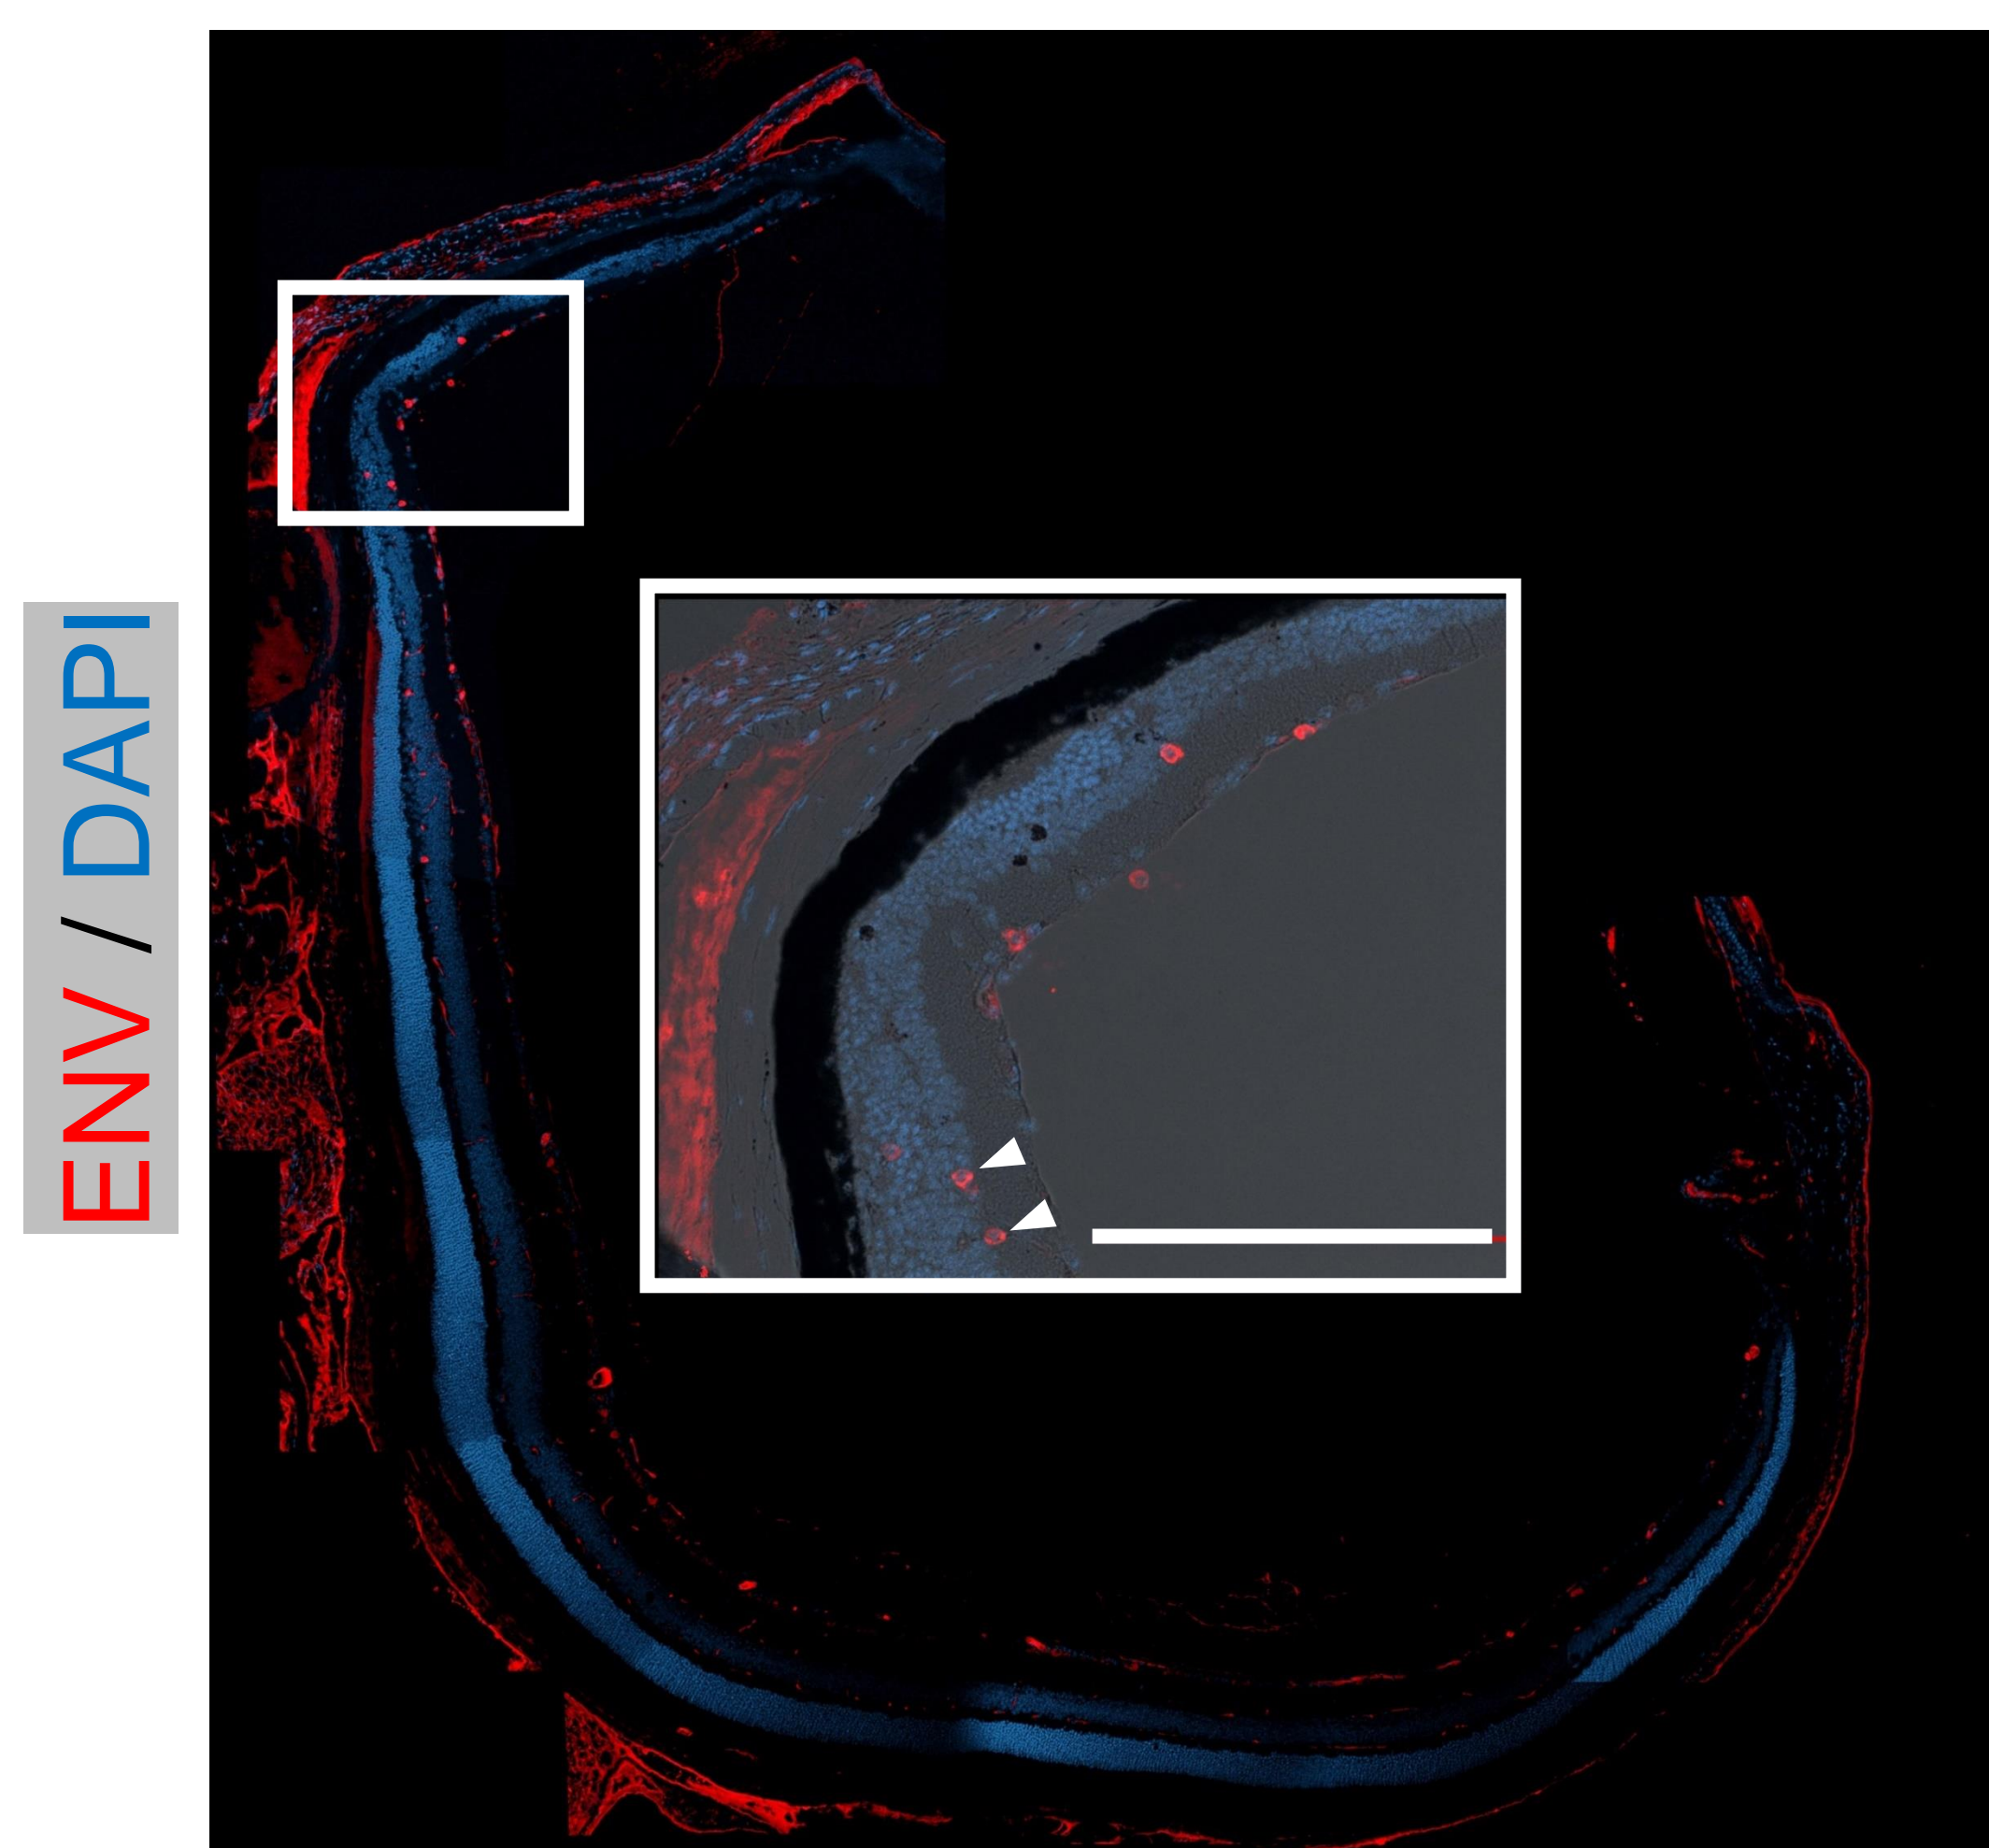

**Figure S4: Long-term retinal consequences of ZIKV infection.** (A) Retinal sections from both mock and 60 dpi ZIKV<sup>MEX</sup> infected mouse were stained with retinal ganglion cell marker (RBPMS). Representative areas of RGC loss were indicated by asterisks. (B and C) Histology and ZIKV ENV staining of retina from two long term infected mice with different tissue damage. Arrows, intravitreal cell infiltrates; asterisks, area of severe retinal degeneration with total loss of photoreceptors; arrowheads, residual retinal viral staining in the inner nuclear layer. Scale bars= 200  $\mu$ m
