# Supplementary material for: Viral Retinopathy in Experimental Models of Zika Infection
Source: PubMed Central journal article supplement — Invest Ophthalmol Vis Sci. 2017 Aug;58(10):4075–85. doi: 10.1167/iovs.17-22016 (PMC5558627; doi:10.1167/iovs.17-22016), 2017-08
Supplement: IOVS-58-10-14_s02.pdf [file IOVS-58-10-14_s02.pdf]

**Table S1. List of Antibodies and Dilutions Used for Experiments**

| <b>Cell type / Target</b> | <b>Antigen</b>                                     | <b>Supplier</b>               | <b>Cat number</b> | <b>Dilution</b>        |
|---------------------------|----------------------------------------------------|-------------------------------|-------------------|------------------------|
| ZIKV                      | Envelop protein (ENV)                              | BioFront Technologies         | BF-1176-56        | 1:200 IF<br>1:1000 WB  |
| ZIKV                      | Nonstructural protein 1 (NS1)                      | BioFront Technologies         | BF-1225-46        | 1: 100 IF<br>1:1000 WB |
| Müller cell / Astrocytes  | Glial fibrillary acidic protein (GFAP)             | Cell Signaling Technology     | 12389S            | 1:200                  |
| Müller cell               | Glutamine synthetase (GS)                          | Abcam                         | ab73593           | 1:200                  |
| Müller cell               | CD44                                               | eBioscience                   | 11-0441-85        | 1:100                  |
| Microglia                 | Ionized calcium-binding adapter molecule 1 (IBA1)  | Wako Pure Chemical Industries | 019-19741         | 1:500                  |
| Retinal ganglion cell     | RNA binding protein with multiple splicing (RBPMS) | EMD Milipore                  | ABN1362           | 1:100                  |
| Cone photoreceptor        | Peanut agglutinin                                  | Thermo Fisher Scientific      | L21409            | 1:200                  |
| Apoptosis                 | Caspase3                                           | Pharmingen                    | 65906E            | 1:200                  |
| Inflammation              | Interleukin 6 (IL6)                                | Santa Cruz Biotechnology      | sc-1265           | 1:1500                 |
| Inflammation              | Interleukin 1 $\beta$ (IL1 $\beta$ )               | eBioscience                   | 47-7114-80        | 1:1500                 |
| Angiogenesis              | Vascular endothelial growth factor (VEGF)          | R&D Systems                   | AF-493-NA         | 1:1000                 |
| Receptor tyrosine kinase  | AXL                                                | Santa Cruz Biotechnology      | sc-1097           | 1:1000                 |
| Receptor tyrosine kinase  | TYRO3                                              | Santa Cruz Biotechnology      | sc-166359         | 1:1200                 |

IF: immunofluorescence; WB: Western blot

**Table S2. List of Primers and Reference Genes**

| <b>Gene Name</b> | <b>Forward (5'-3')</b>          | <b>Reverse (5'-3')</b>             | <b>Amplicon Size (bp)</b> | <b>Reference Sequence</b> |
|------------------|---------------------------------|------------------------------------|---------------------------|---------------------------|
| <i>m_Axl</i>     | CGG GGA AAG AAG TCT GGG AG      | TTC AGG CCT GGA GTT TGC AG         | 813                       | NM_001190975.1            |
| <i>m_Cd209a</i>  | CCC TCT GGA TGA GGA ACT GCT     | TCC AGC CGT CAT CTC TGA AC         | 608                       | NM_010502.2               |
| <i>m_Tim1</i>    | CTC CCA GGC GCT GTG GAT T       | GGG ATT CCT GTC ACC TCA GC         | 557                       | XM_006532393.3            |
| <i>m_Tyro3</i>   | GAC TGG CTT CTC TGC TGC TC      | CTG GGT CAC TCC TGT CAC AT         | 506                       | NM_019392.2               |
| <i>m_Ifna1</i>   | ACC CAG CAG ATC CTG AAC AT      | AAT GAG TCT AGG AGG GTT GTA TTC C  | 74                        | NM_010502.2               |
| <i>m_Ifna2</i>   | GAA GGA CAG GCA GGA CTT TG      | TTG AGC CTT CTG GAT CTG CT         | 67                        | NM_010503.2               |
| <i>m_Ifna4</i>   | TCA AGC CAT CCT TGT GCT AA      | GTC TTT TGA TGT GAA GAG GTT CAA    | 64                        | NM_010504.2               |
| <i>m_Ifnb1</i>   | AAA GGA CGA ACA TTC GGA AA      | GCC CTG TAG GTG AGG TTG AT         | 73                        | NM_010510.1               |
| <i>m_Glul</i>    | TTC CTC GTG CCC AGT TAA TC      | CCC AGT GAA TAG GAT GGT TCT C      | 607                       | NM_008131.4               |
| <i>m_Bdnf</i>    | GCA TCT GTT GGG GAG ACA AG      | AAG GAT GGT CAT CAC TCT TCT CA     | 94                        | NM_007540.4               |
| <i>m_Cntf</i>    | GAC CTG ACT GCT CTT ATG GAA TCT | GCC TGG AGG TTC TCT TGG A          | 149                       | NM_170786.2               |
| <i>m_Igf1</i>    | GAC CGA GGG GCT TTT ACT TC      | CAT CCA CAA TGC CTG TCT GA         | 81                        | XM_017313812.1            |
| <i>hu_Ifna1</i>  | TGA TGA ATG CGG ACT CCA         | TCT GTC AGA TAG AGA GTG ATT CTT CG | 67                        | NM_024013.2               |
| <i>hu_Ifna2</i>  | AAT GGC CTT GAC CTT TGC TT      | CAC AGA GCA GCT TGA CTT GC         | 67                        | NM_000605.3               |
| <i>hu_Ifnb1</i>  | CGA CAC TGT TCG TGT TGT CA      | GAA GCA CAA CAG GAG AGC AA         | 67                        | NM_002176.3               |
| <i>hu_Ifnγ</i>   | GGC ATT TTG AAG AAT TGG AAA G   | TTT GGA TGC TCT GGT CAT CTT        | 112                       | NM_000619.2               |
| <i>ZIKV_Ns4</i>  | GCC GGA ATA ACC TAC ACA GAT AG  | CTC CTC TCT CCT TCC CAT TAG A      | 714                       | KU955593                  |
| <i>ZIKV_Ns1</i>  | CAG GGC AGC AAA GAC AAA TAA C   | GGG CCT TAT CTC CAT TCC ATA C      | 640                       | KU955593                  |
| <i>ZIKV_Pol</i>  | GGT GTT GAA GGG CTA GGA TTA C   | CTC CTC AAT CCA CAC TCT GTT C      | 948                       | KU955593                  |

**Table S3. List of siRNA Sequences**

| Gene Name      | siRNA 1 (5'-3')                                                                                                               | siRNA 2 (5'-3')                                                                                                               |
|----------------|-------------------------------------------------------------------------------------------------------------------------------|-------------------------------------------------------------------------------------------------------------------------------|
| <i>m_Axl</i>   | rGrUrG rArUrG rGrUrC rArArC rUrArC rArGrA rUrUrC rUrGA A<br>rArArA rGrUrU rUrArG rUrCrC rArArG rGrUrU rCrUrA rGrAT T          | rArArA rGrUrU rUrArG rUrCrC rArArG rGrUrU rCrUrA rGrAT T<br>rArArU rCrUrA rGrArA rCrCrU rUrGrG rArCrU rArArA rCrUrU<br>rUrArG |
| <i>m_Tyro3</i> | rGrArU rUrGrG rCrUrU rArCrU rCrArG rCrCrU rArArA rGrUC A<br>rUrGrA rCrUrU rUrArG rGrCrU rGrArG rUrArA rGrCrC rArArU<br>rCrCrA | rUrGrG rUrGrG rGrArU rArUrU rCrUrC rArGrG rUrCrU rGrAA T<br>rArUrU rCrArG rArCrC rUrGrA rGrArA rUrArU rCrCrC rArCrC<br>rArUrU |
| h_Axl          | rGrArG rUrCrC rArArG rArArU rCrCrA rCrArU rUrUrC rUrAA A<br>rUrUrU rArGrA rArArU rGrUrG rGrArU rUrCrU rUrGrG rArCrU<br>rCrUrU | rGrArC rCrArC rUrGrA rArGrC rUrArC rCrUrU rGrArA rCrAG C<br>rGrCrU rGrUrU rCrArA rGrGrU rArGrC rUrUrC rArGrU rGrGrU<br>rCrCrG |
| h_Tyro3        | rCrUrA rUrUrA rCrCrA rCrArC rUrUrG rGrGrG rUrUrU rArAA T<br>rArUrU rUrArA rArCrC rCrCrA rArGrU rGrUrG rGrUrA rArUrA<br>rGrCrU | rGrCrU rUrUrC rCrArG rCrArG rCrArA rCrGrC rUrArG rUrGT G<br>rCrArC rArCrU rArGrC rGrUrU rGrCrU rGrCrU rGrGrA rArArG<br>rCrUrU |
